# Supplementary material for: Boolean operations mediated by an ion-pair receptor of a multi-readout molecular logic gate
Source: Royal Society of Chemistry journal article supplement (doi:10.1039/c3cc45377d), 2013-01-01
Supplement: c3cc45377d.pdf [file c3cc45377d.pdf]

## Boolean operations mediated by an ion-pair receptor of a multi-readout molecular logic gate<sup>†</sup>

Raúl Gotor, Ana M. Costero,\* Salvador Gil, Margarita Parra, Pablo Gaviña, and Knut Rurack\*

### Electronic Supplementary information

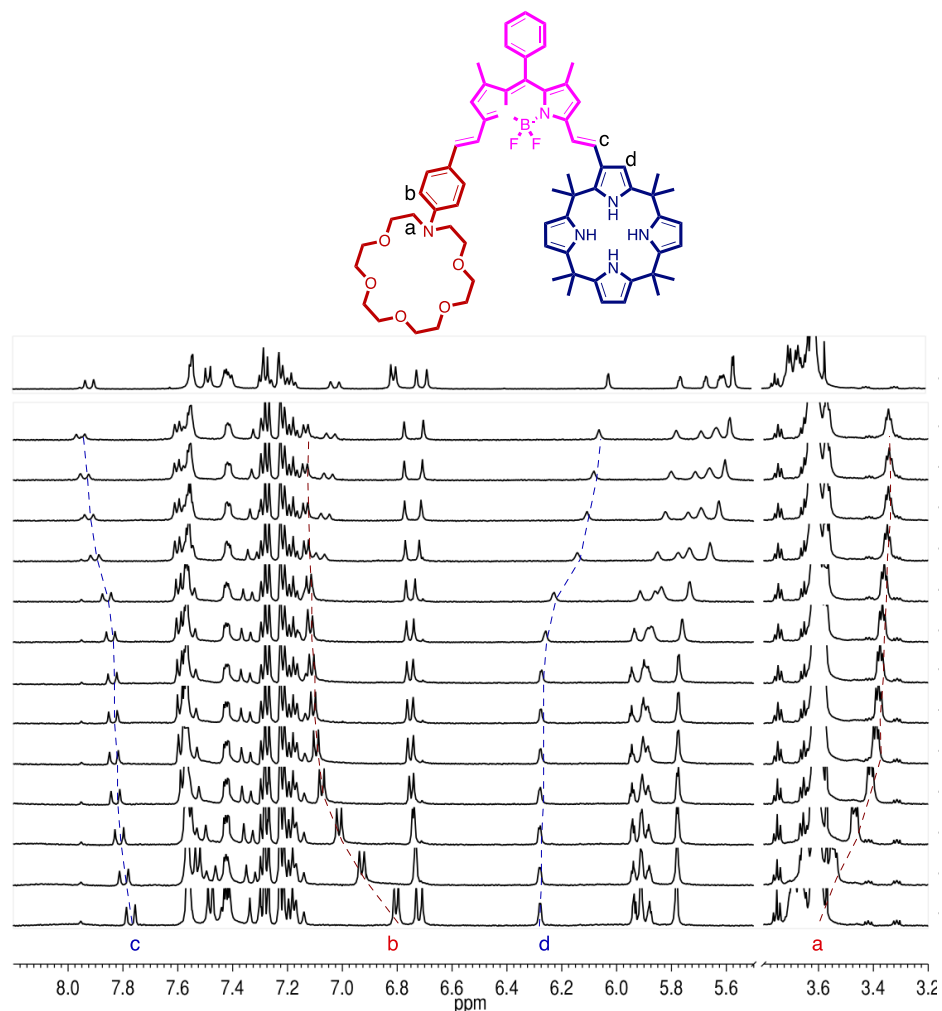

**Figure S1-** <sup>1</sup>H-NMR titration of compound **1** (5 mM in CD<sub>3</sub>CN) with different amounts of KClO<sub>4</sub> and then TBAF. <sup>1</sup>H-NMR of **1** (5 mM in CD<sub>3</sub>CN) with 3 eq. of TBAF is included on top for comparison purposes.

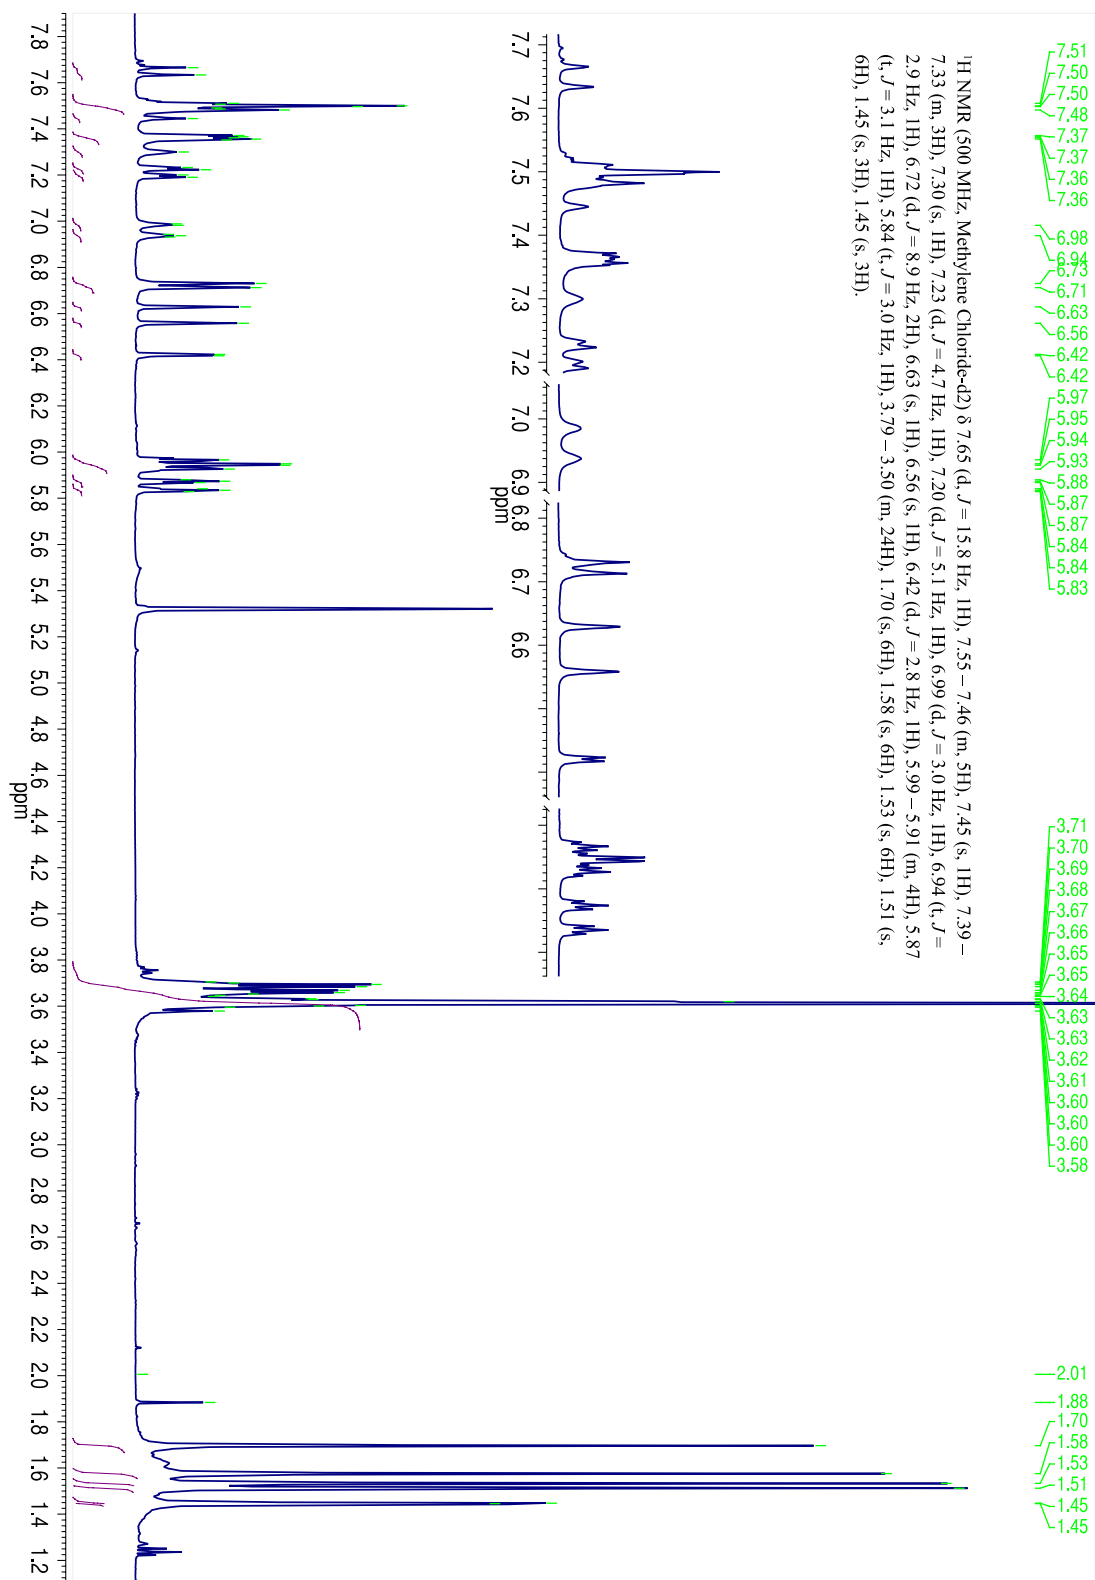

Figure S2- <sup>1</sup>H-NMR spectrum of **1** in CD<sub>2</sub>Cl<sub>2</sub>

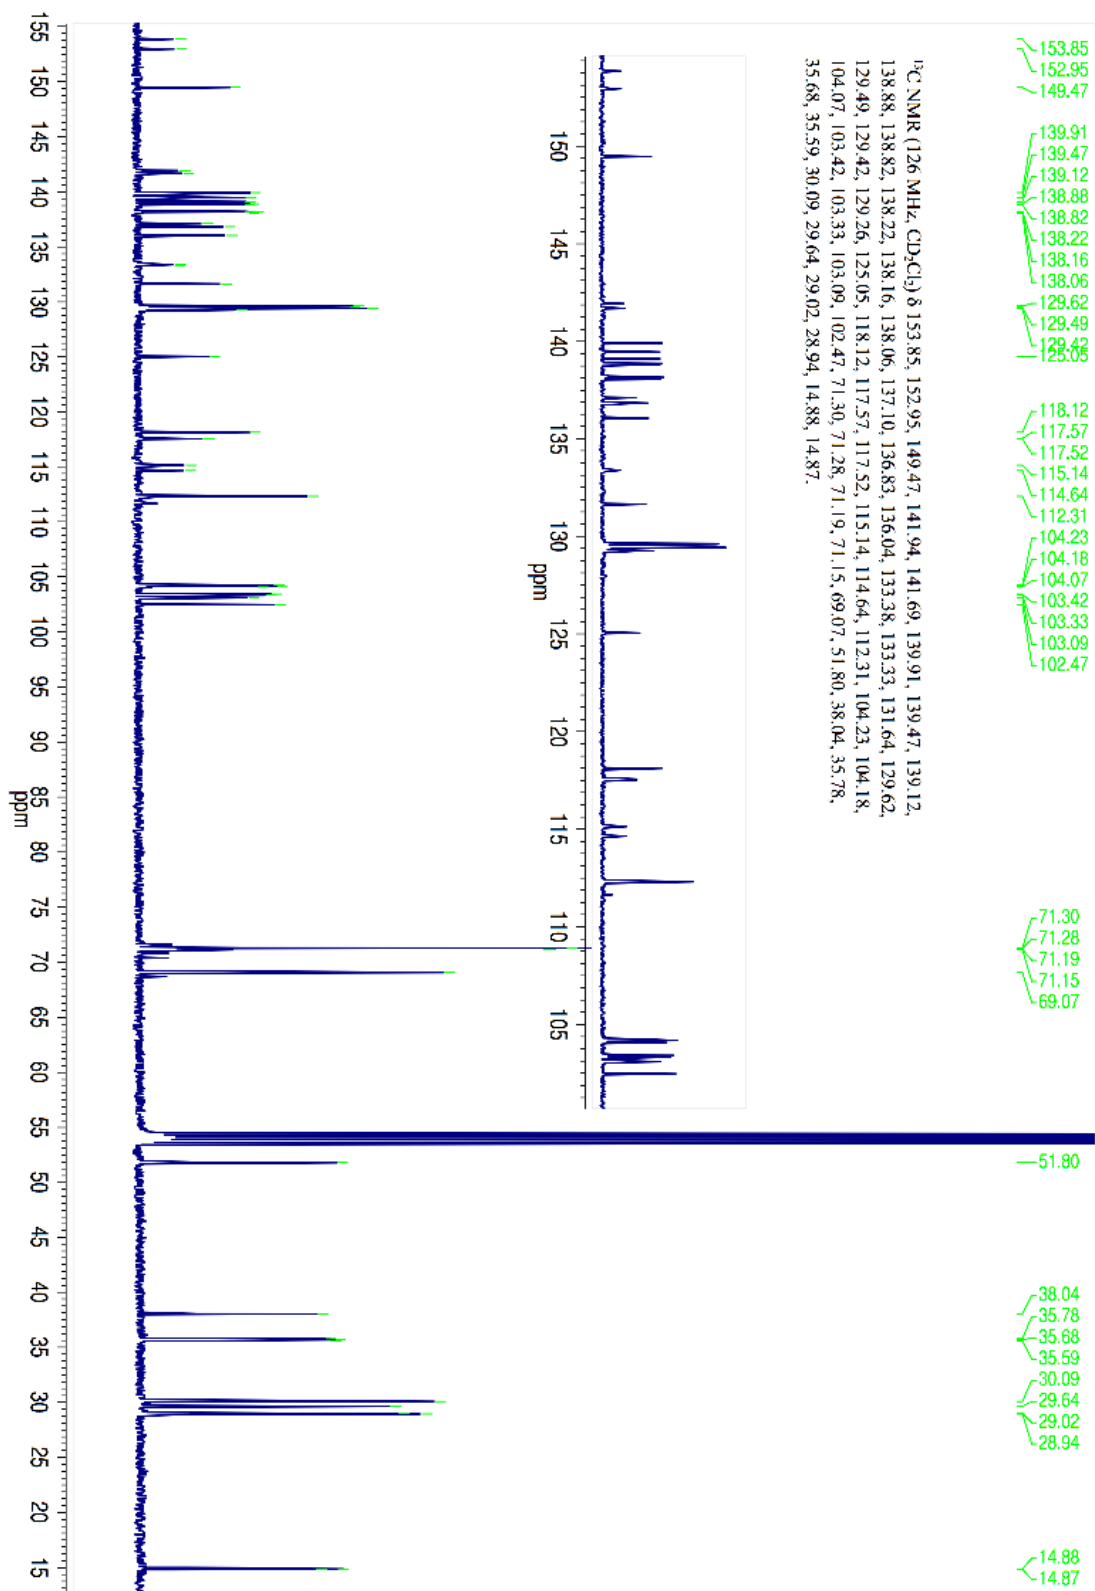

Figure S3-  $^{13}\text{C}$ -NMR spectrum of **1** in  $\text{CD}_2\text{Cl}_2$

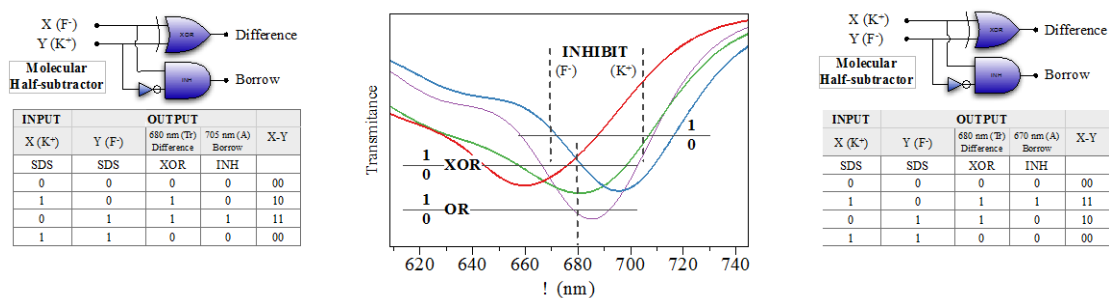

**Figure S4-** INHIBIT gates and half-subtractor true tables in the transmittance mode

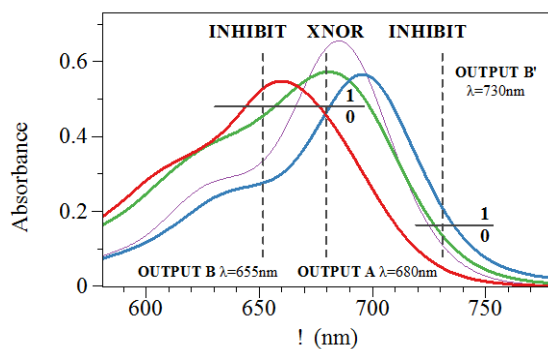

**Figure S5-** Other INHIBIT gates in the absorption mode, using K<sup>+</sup> or F<sup>-</sup> as single inputs

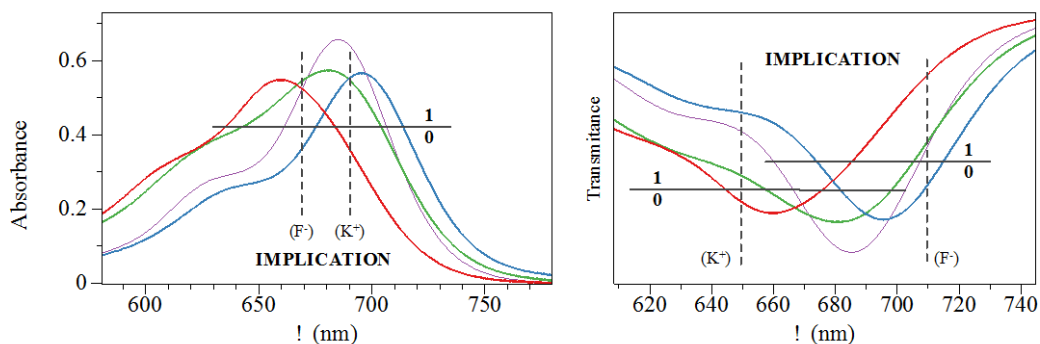

**Figure S6-** IMPLICATION gates operating both in absorbance or transmission modes, using K<sup>+</sup> or F<sup>-</sup> as single inputs

**Spectroscopic details:** Steady-state absorption and fluorescence measurements were carried out using a Analytik Jena Specord 210 Plus spectrophotometer, a Spectronics Instrument 8100 spectrofluorometer and a Horiba Jobin-Yvon FluoroMax-4P spectrofluorometer. For all measurements, the temperature was kept constant at (298±1) K. Unless otherwise noted, only dilute solutions with an absorbance of less than 0.1 at the absorption maximum were used. Fluorescence experiments were performed with a 90° standard geometry, with polarisers set at 54.78 for emission and 08 for excitation. The fluorescence quantum yields ( $\Phi_f$ ) were determined relative to compound **3** of ref. S1 in acetonitrile ( $\Phi_f = 0.10$ )

$\pm 0.01$ ). The uncertainties of measurement were determined to  $\pm 5\%$  (for  $\Phi_f > 0.2$ ) and  $\pm 10\%$  (for  $0.2 > \Phi_f > 0.02$ ).

S1. Y.-H. Yu, A. B. Descalzo, Z. Shen, H. Röhr, Q. Liu, Y.-W. Wang, M. Spieles, Y.-Z. Li, K. Rurack and X.-Z. You, *Chem. Asian. J.*, 2006, **1**, 176–187.
